# Supplementary material for: In situ monitoring of the shikimate pathway: a combinatorial approach of Raman reverse stable isotope probing and hyperspectral imaging
Source: Royal Society of Chemistry journal article supplement (doi:10.1039/d4an00203b), 2024-01-01
Supplement: d4an00203b1.pdf [file d4an00203b1.pdf]

## SUPPLEMENTAL

## INFORMATIONS:

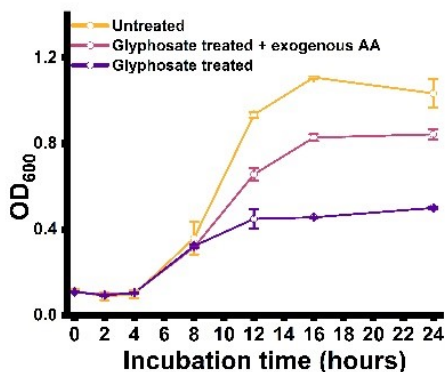

Figure S1: Growth curve of *E. coli* grown in M9 minimal medium, Glyphosate treated medium, Glyphosate treated medium supplemented with exogenous Aromatic Amino acids.

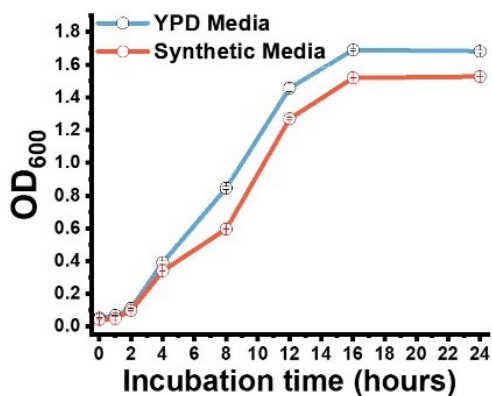

Figure S2: Evaluating the feasibility of Synthetic media with glucose as only carbon source for the growth of *S. cerevisiae*.

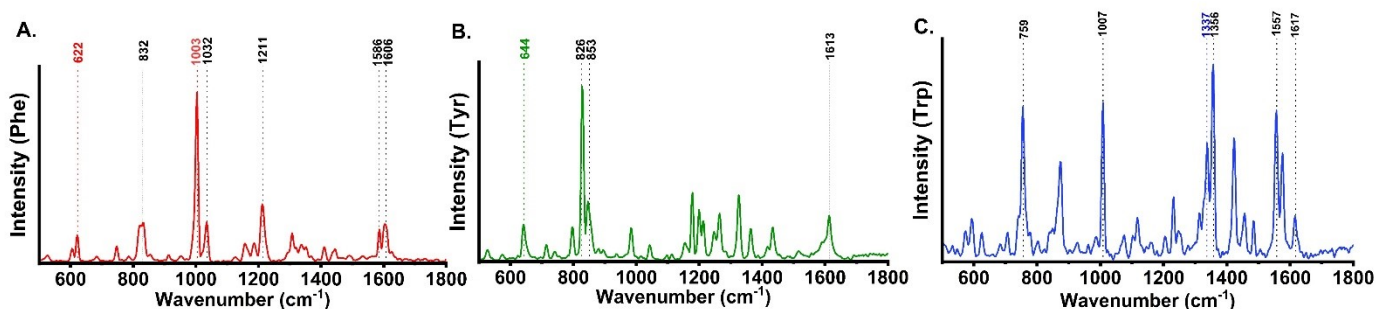

Figure S3: Mean Raman spectra of supplemented exogenous aromatic amino acid and the corresponding reference bands are marked in colours. (A) Phenylalanine (B) Tyrosine (C) Tryptophan.

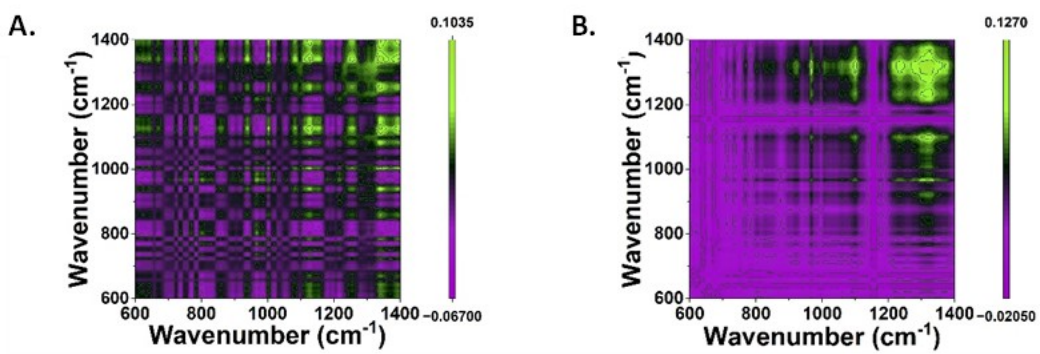

Figure S4: Two-dimensional correlation map in the range (600 – 1400  $\text{cm}^{-1}$ ): (A.) Control (B.) Treated
